# Supplementary material for: Glutamate receptor delocalization in postsynaptic membrane and reduced hippocampal synaptic plasticity in the early stage of Alzheimer’s disease
Source: PubMed Central journal article supplement — Neural Regen Res. 2019 Jun;14(6):1037–45. doi: 10.4103/1673-5374.250625 (PMC6404481; doi:10.4103/1673-5374.250625), 2019-06
Supplement: NRR-14-1037_Suppl1.pdf [file NRR-14-1037_Suppl1.pdf]

## OPEN PEER REVIEW REPORT 1

**Reviewer 1:** Vasily Vorobyov, Russian Academy of Sciences, Institute of Cell Biophysics, Russia.

**Comments to the authors:**

" Glutamate receptors delocalization and impairment of hippocampal long-term potentiation precedes local extracellular A $\beta$  deposition in asymptomatic 5XFAD mouse model".

This relatively compact study demonstrates a lack of associations between time-courses of amyloid beta accumulation, LTP-modification, and memory impairment in 5xFAD mice as a model of Alzheimer disease. More generally, it raises the question whether the hippocampal LTP is a critical mechanism underpinning learning and/or memory processes. The manuscript is clearly written and the main idea is sufficiently supported.

There are several remarks associated with the data presentation in the Results.

- a) Extremely excessive citations in attempt to explain why corresponding experiments were performed in the study. These aspects should be preliminarily described in the Introduction.
- b) Numerical values in the text, duplicating those presented on figures, should be omitted because of formal principles of manuscript preparation, oriented on a convenience for a reader.
- c) The legends should be slightly modified to avoid duplication (for example):

Fig. 1, "n" is the number of mice;

Figs 2 - 4, "n" are the numbers of slices/mice;

Fig. 5, abscissa should be clearly marked: "stimulation intensity ( $\mu$ A)";

Several technical errors: lacking spaces (see, e.g., page 3, lines 20 and 23) and incorrect punctuation (especially in the Abstract), should be fixed.
